# Supplementary material
Source: ML conference proceedings conference paper supplement (https://openreview.net/forum?id=j2AQ-WJ_ze)
Supplement: supplementary_material [file attachment]

## 1

2

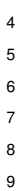

10

11

13

14

16

18 and mixed follow at about half frequency, while color is last, as several objects in OCID share color  
19 between different instances of the same category.

## 20 **2 Qualitative Results**

21 We visualize predicted masks and grasp poses from the implemented baselines and the proposed  
22 CROG model in Fig. 2. We include two examples per referring expression type for test scenes  
23 of OCID-VLG dataset. Zero-shot baselines based on pretrained GR-ConvNet provide poor grasp  
24 proposals, while supervised baselines + CLIP (Det-Seg, SSG) are constrained by the ranking errors  
25 of CLIP. Due to segment-then-rank pipeline, spatial information about other objects is lost when  
26 considering only the mask of a single object. As a result, CLIP-based baselines struggles with  
27 grounding spatial relations. CROG is robust across referring expression types.

28 In Fig. 3, we visualize outputs of the CROG model during real robot experiments. The plots include  
29 predicted mask and grasp proposal, as well as the three decoded masks from CROG’s grasp projec-  
30 tors (quality, angle and width masks). It should be noted that the corresponding input command is  
31 shown atop each image.

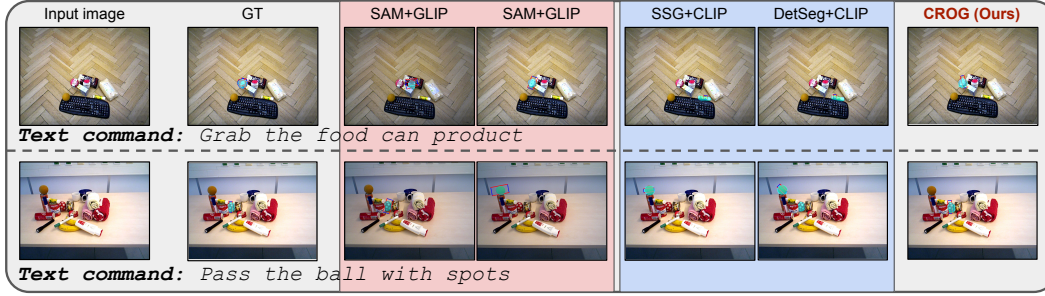

(a) Results in referring expressions by name.

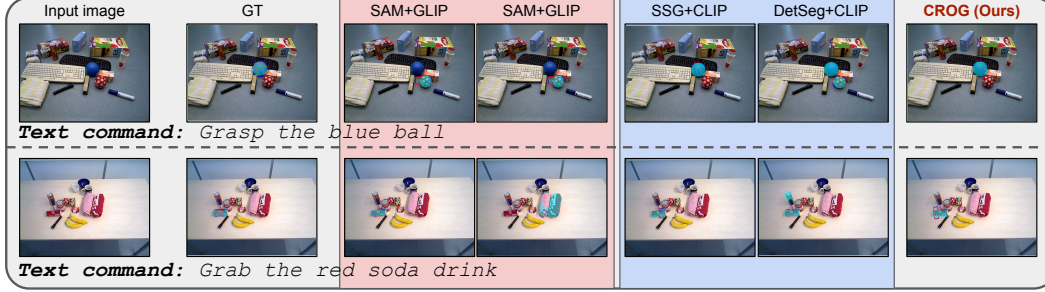

(b) Results in referring expressions by attribute.

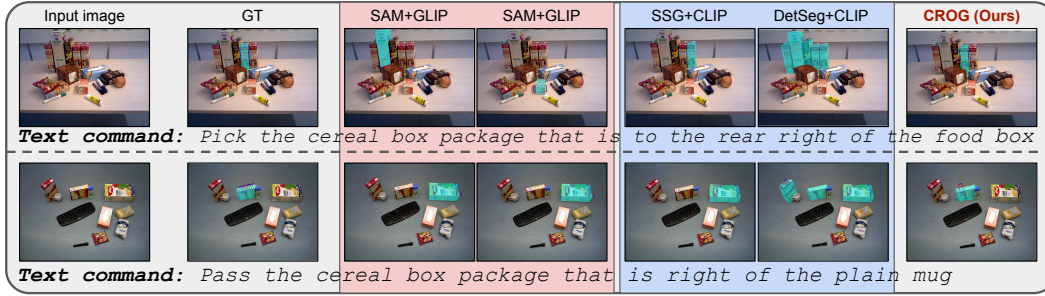

(c) Results in referring expressions by relation.

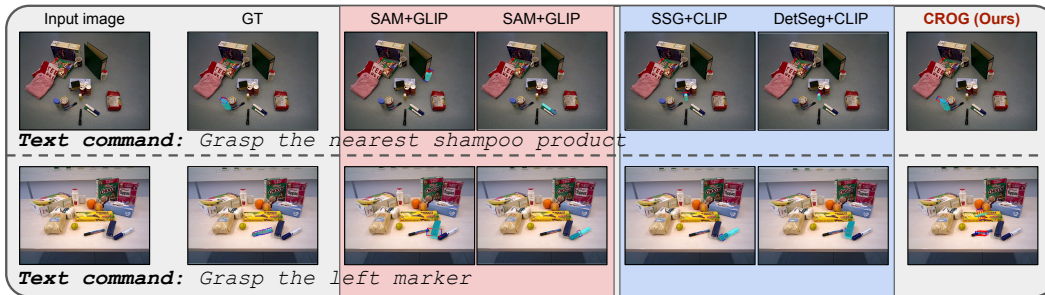

(d) Results in referring expressions by location.

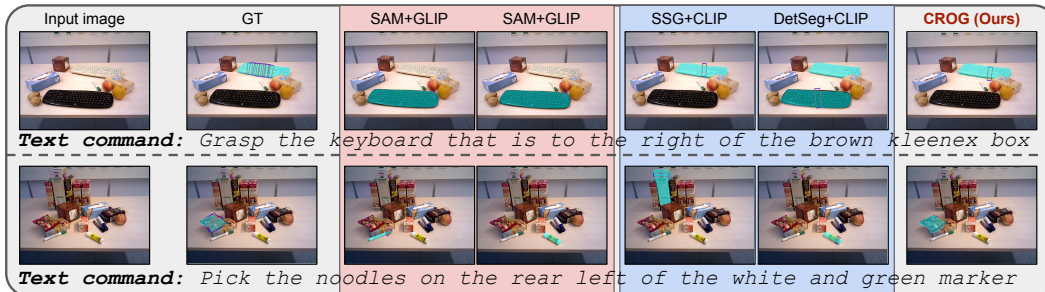

(e) Results in referring expressions by a mix of concepts.

Figure 2: Qualitative results in OCID-VLG test scenes.

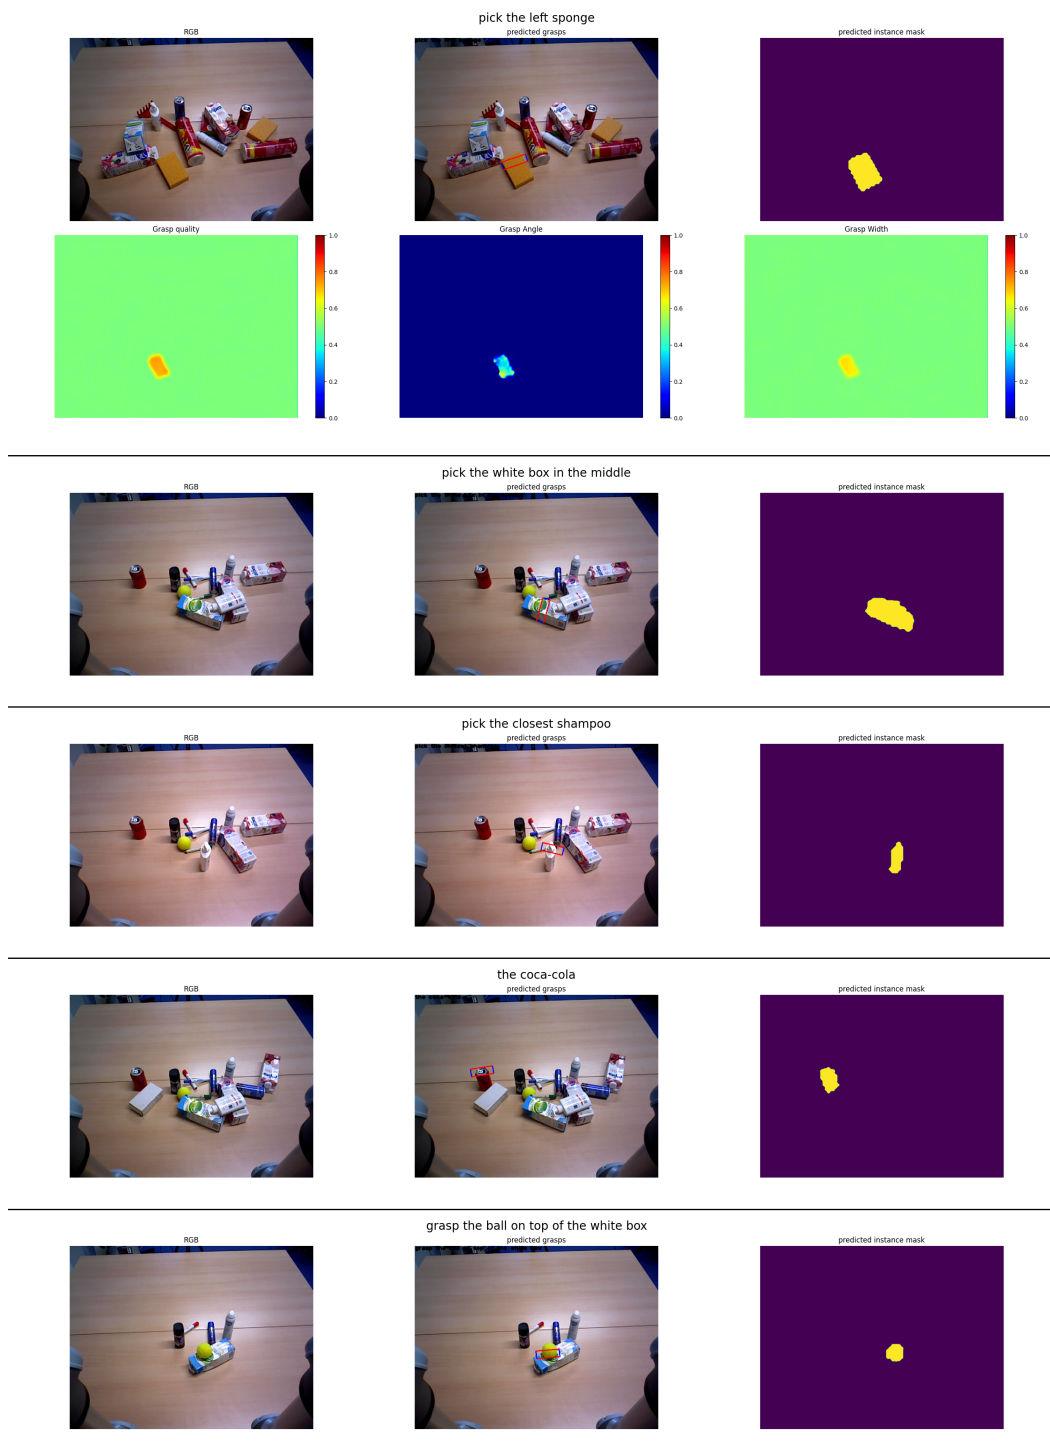

Figure 3: Qualitative results in real robot experiments.
